# Supplementary material
Source: MDPI journal article supplement (https://www.mdpi.com/2073-4395/11/11/2252)
Supplement: s1 [file s1]

Table S1: Individual and total phenolic contents of pungent cultivar ‘Eris F1’ before (**A**) and after storage (**B**) (mg kg<sup>-1</sup>; mean ± SE; n = 15) infested with *H. halys*.

| <b>A</b>                               | Pungent ‘Eris F1’         |                   |                   |                   |                   |                    |
|----------------------------------------|---------------------------|-------------------|-------------------|-------------------|-------------------|--------------------|
|                                        | Pericarp                  |                   |                   | Placenta          |                   |                    |
|                                        | Control                   | <i>H. halys</i>   | Control 2         | Control           | <i>H. halys</i>   | Control 2          |
| 5-Caffeoylquinic a. ♦                  | 0.9 ± 0.0                 | 0.9 ± 0.0         | 0.9 ± 0.0         | 1.9 ± 0.1         | 1.9 ± 0.1         | 2.0 ± 0.2          |
| <b>Hydroxycinnamic a. ♦</b>            | <b>0.9 ± 0.0</b>          | <b>0.9 ± 0.0</b>  | <b>0.9 ± 0.0</b>  | <b>1.9 ± 0.1</b>  | <b>1.9 ± 0.1</b>  | <b>2.0 ± 0.2</b>   |
| L. 6-C-hexoside-8-C-pentoside 2        | 147.4 ± 23.5              | 121.4 ± 4.3       | 148.4 ± 4.1       | /                 | /                 | /                  |
| L. 6-C-pentoside-8-C-hexoside 2        | 67.5 ± 8.5                | 56.6 ± 1.4        | 88.7 ± 2.4        | /                 | /                 | /                  |
| L.-6-C-hexoside                        | 14.2 ± 2.2                | 15.2 ± 0.1        | 18.2 ± 0.8        | 41.2 ± 0.8        | 51.5 ± 1.6        | 55.2 ± 0.8         |
| L.-8-C-hexoside                        | 26.3 ± 6.6                | 30.4 ± 0.5        | 32.7 ± 0.9        | 67.4 ± 1.2        | 69.4 ± 2.0        | 85.3 ± 1.9         |
| L.-7-O-(2-apiosyl-6-acetyl) hexoside   | 24.6 ± 2.2                | 30.7 ± 0.4        | 33.2 ± 0.9        | 41.1 ± 0.5 a      | 23.3 ± 0.3 b      | 43.4 ± 0.3 a       |
| L.-7-O-(2-apiosyl-6-malonyl) hexoside  | 61.4 ± 3.4                | 74.4 ± 1.2        | 105.4 ± 3.1       | 110.3 ± 0.8 b     | 155.2 ± 0.6 a     | 123.2 ± 0.7 b      |
| L. 6,8-di-C-hexoside                   | 29.2 ± 6.0 b <sup>i</sup> | 75.8 ± 1.7 a      | 38.4 ± 0.4 b      | 1120.4 ± 157.7    | 945.5 ± 111.4     | 1090.4 ± 71.9      |
| C. 7-O-(2-apiosyl-6-acetyl)glucoside   | 173.4 ± 22.0              | 150.5 ± 5.0       | 242.2 ± 9.6       | 82.5 ± 1.6        | 45.4 ± 0.9        | 60.2 ± 0.7         |
| A. 6-C-hexoside-8-C-pentoside 1        | 23.2 ± 3.0                | 39.4 ± 0.5        | 21.7 ± 0.6        | 71.1 ± 1.0        | 61.2 ± 0.7        | 114.6 ± 1.9        |
| A. 6-C-hexoside-8-C-pentoside 2        | 14.6 ± 2.0                | 18.8 ± 0.1        | 20.1 ± 0.7        | 31.2 ± 0.3        | 38.4 ± 0.7        | 42.1 ± 0.7         |
| A. 6-C-pentoside-8-C-hexoside          | 147.2 ± 1.6               | 141.4 ± 4.0       | 175.4 ± 4.1       | 19.5 ± 0.3        | 21.2 ± 1.2        | 40.5 ± 1.0         |
| A. 6,8 di-C-hexoside                   | 43.4 ± 0.4                | 52.2 ± 1.2        | 69.3 ± 2.0        | 36.2 ± 0.3        | 37.5 ± 0.5        | 36.2 ± 0.4         |
| <b>Flavone ♦</b>                       | <b>0.7 ± 0.1</b>          | <b>0.8 ± 0.2</b>  | <b>0.6 ± 0.0</b>  | <b>1.4 ± 0.2</b>  | <b>1.4 ± 0.2</b>  | <b>1.7 ± 0.2</b>   |
| Q.-3-O-rhamnoside-7-O-hexoside         | 4.2 ± 0.0                 | 20.2 ± 0.7        | 7.3 ± 0.1         | 59.1 ± 1.2        | 69.2 ± 1.0        | 111.7 ± 4.4        |
| Q.-3-O-rhamnoside                      | 8.4 ± 0.1                 | 14.4 ± 0.6        | 27.2 ± 1.4        | 5.4 ± 0.1         | 10.4 ± 0.3        | 9.1 ± 0.4          |
| Q.-3-O-glucoside                       | 9.3 ± 0.1                 | 11.2 ± 0.1        | 14.6 ± 0.8        | 7.6 ± 0.0         | 8.2 ± 0.2         | 9.2 ± 0.1          |
| <b>Flavonols</b>                       | <b>20.4 ± 0.3</b>         | <b>50.4 ± 1.7</b> | <b>18.2 ± 0.2</b> | <b>54.2 ± 0.2</b> | <b>88.4 ± 7.0</b> | <b>100.3 ± 5.8</b> |
| <b>Total analyzed per fruit part ♦</b> | <b>1.6 ± 0.1</b>          | <b>1.7 ± 0.2</b>  | <b>1.5 ± 0.1.</b> | <b>3.3 ± 0.2</b>  | <b>3.4 ± 0.2</b>  | <b>3.8 ± 0.1</b>   |
| <b>Total analyzed whole fruit ♦</b>    | <b>1.4 ± 0.0</b>          | <b>1.5 ± 0.1</b>  | <b>1.3 ± 0.1</b>  |                   |                   |                    |

|       |            |            |            |            |            |            |
|-------|------------|------------|------------|------------|------------|------------|
| TPC ♦ | 11.4 ± 0.7 | 12.5 ± 0.4 | 11.6 ± 0.9 | 14.6 ± 0.7 | 10.7 ± 0.6 | 11.6 ± 1.0 |
|-------|------------|------------|------------|------------|------------|------------|

<sup>i</sup>a,b different letters denote statistical significant differences ( $\alpha \leq 0.05$ ) among treatments in the same cultivar and fruit part

♦ Symbol indicates data in g kg<sup>-1</sup>

/ Symbol indicates that the substance could not be determined

| B                                      | Pungent 'Eris F1' after storage |                   |                   |                   |                   |                   |
|----------------------------------------|---------------------------------|-------------------|-------------------|-------------------|-------------------|-------------------|
|                                        | Pericarp                        |                   |                   | Placenta          |                   |                   |
|                                        | Control                         | <i>H. halys</i>   | Control 2         | Control           | <i>H. halys</i>   | Control 2         |
| 5-Caffeoxlquinic a. ♦                  | 0.8 ± 0.0                       | 0.9 ± 0.0         | 0.8 ± 0.0         | 1.9 ± 0.2         | 1.7 ± 0.0         | 1.9 ± 0.1         |
| <b>Hydroxycinnamic a. ♦</b>            | <b>0.8 ± 0.0</b>                | <b>0.9 ± 0.0</b>  | <b>0.8 ± 0.0</b>  | <b>1.9 ± 0.2</b>  | <b>1.7 ± 0.0</b>  | <b>1.9 ± 0.1</b>  |
| L. 6-C-hexoside-8-C-pentoside 2        | 111.6 ± 12.2                    | 90.1 ± 10.0       | 131.4 ± 20.1      | /                 | /                 | /                 |
| L. 6-C-pentoside-8-C-hexoside 2        | 41.8 ± 3.0                      | 29.4 ± 1.9        | 42.1 ± 1.3        | /                 | /                 | /                 |
| L.-6-C-hexoside                        | 15.8 ± 2.7 b <sup>i</sup>       | 36.3 ± 6.0 a      | 17.3 ± 4.0 b      | 38.1 ± 1.0        | 25.7 ± 0.5        | 33.2 ± 0.7        |
| L.-8-C-hexoside                        | 35.6 ± 0.6                      | 47.1 ± 1.0        | 30.4 ± 0.6        | 87.3 ± 2.8        | 74.1 ± 1.3        | 86.6 ± 1.2        |
| L.-7-O-(2-aposyl-6-acetyl) hexoside    | 26.4 ± 0.4                      | 24.7 ± 0.2        | 20.2 ± 0.2        | 33.1 ± 0.7        | 24.5 ± 0.1        | 27.1 ± 0.1        |
| L.-7-O-(2-aposyl-6-malonyl) hexoside   | 76.2 ± 0.6                      | 59.2 ± 0.4        | 69.4 ± 0.7        | 137.3 ± 1.3       | 129.3 ± 0.6       | 143.2 ± 11.0      |
| L. 6,8-di-C-hexoside                   | 72.4 ± 0.3 b                    | 203.5 ± 17.9 a    | 85.2 ± 0.4 b      | 218.5 ± 30.0      | 174.1 ± 12.7      | 213.5 ± 18.0      |
| C. 7-O-(2-aposyl-6-acetyl)glucoside    | 78.6 ± 1.4                      | 78.2 ± 0.7        | 89.4 ± 2.5        | 38.3 ± 1.0        | 41.2 ± 1.0        | 85.2 ± 1.4        |
| A. 6-C-hexoside-8-C-pentoside 1        | 42.2 ± 0.8                      | 55.4 ± 0.8        | 60.2 ± 2.2        | 91.7 ± 5.3        | 69.6 ± 1.8        | 93.7 ± 1.5        |
| A. 6-C-hexoside-8-C-pentoside 2        | 15.3 ± 0.1                      | 11.3 ± 0.1        | 10.6 ± 0.3        | 29.2 ± 0.4        | 25.4 ± 0.3        | 34.2 ± 0.5        |
| A. 6-C-pentoside-8-C-hexoside          | 125.6 ± 2.3                     | 129.1 ± 0.7       | 123.2 ± 2.8       | 39.4 ± 0.4        | 40.3 ± 0.9        | 40.4 ± 0.2        |
| A. 6,8 di-C-hexoside                   | 47.3 ± 1.0                      | 36.5 ± 0.2        | 32.3 ± 0.7        | 32.6 ± 0.4        | 22.1 ± 0.2        | 29.1 ± 0.2        |
| <b>Flavone ♦</b>                       | <b>0.7 ± 0.0</b>                | <b>0.8 ± 0.0</b>  | <b>0.6 ± 0.1</b>  | <b>0.6 ± 0.1</b>  | <b>0.5 ± 0.1</b>  | <b>0.6 ± 0.0</b>  |
| Q.-3-O-rhamnoside-7-O-hexoside         | 8.3 ± 0.0                       | 9.3 ± 0.1         | 8.7 ± 0.0         | 43.6 ± 0.9        | 33.4 ± 0.4        | 40.4 ± 0.4        |
| Q.-3-O-rhamnoside                      | 14.2 ± 0.2 a                    | 4.5 ± 0.2 b       | 9.3 ± 0.1 ab      | 5.2 ± 0.0         | 7.2 ± 0.0         | 4.1 ± 0.0         |
| Q.-3-O-glucoside                       | 6.7 ± 0.3 a                     | 5.3 ± 0.1 a       | 6.6 ± 0.1 a       | 4.5 ± 0.1         | 4.6 ± 0.0         | 4.2 ± 0.0         |
| <b>Flavonols</b>                       | <b>28.1 ± 0.5</b>               | <b>17.4 ± 0.2</b> | <b>23.2 ± 3.0</b> | <b>49.4 ± 3.8</b> | <b>42.2 ± 4.0</b> | <b>45.4 ± 5.1</b> |
| <b>Total analyzed per fruit part ♦</b> | <b>1.5 ± 0.0</b>                | <b>1.6 ± 0.0</b>  | <b>1.5 ± 0.1</b>  | <b>2.6 ± 0.2</b>  | <b>2.2 ± 0.1</b>  | <b>2.6 ± 0.1</b>  |
| <b>Total analyzed whole fruit ♦</b>    | <b>1.2 ± 0.0</b>                | <b>1.4 ± 0.1</b>  | <b>1.3 ± 0.1</b>  |                   |                   |                   |
| <b>TPC ♦</b>                           | <b>11.2 ± 0.9</b>               | <b>10.3 ± 0.9</b> | <b>9.1 ± 0.5</b>  | <b>10.9 ± 0.5</b> | <b>7.9 ± 0.6</b>  | <b>8.8 ± 0.3</b>  |

<sup>i</sup>a,b different letters denote statistical significant differences ( $\alpha \leq 0.05$ ) among treatments in the same cultivar and fruit part

◆ Symbol indicates data in g kg<sup>-1</sup>

/ Symbol indicates that the substance could not be determined

Table S2: Individual and total phenolic contents of non-pungent cultivar ‘Lombardo tago’ before (**A**) and after storage (**B**) (mg kg<sup>-1</sup>; mean ± SE; n = 15) infested with *H. halys*.

| <b>A</b>                              | Non-pungent ‘Lombardo tago’ |                     |                    |                    |                    |                    |
|---------------------------------------|-----------------------------|---------------------|--------------------|--------------------|--------------------|--------------------|
|                                       | Pericarp                    |                     |                    | Placenta           |                    |                    |
|                                       | Control                     | <i>H. halys</i>     | Control 2          | Control            | <i>H. halys</i>    | Control 2          |
| 5-Caffeoylquinic a. ♦                 | 0.8 ± 0.0                   | 0.9 ± 0.0           | 0.9 ± 0.0          | 2.4 ± 0.1          | 2.1 ± 0.1          | 2.2 ± 0.0          |
| <b>Hydroxycinnamic a. ♦</b>           | <b>0.8 ± 0.0</b>            | <b>0.9 ± 0.0</b>    | <b>0.9 ± 0.0</b>   | <b>2.4 ± 0.1</b>   | <b>2.1 ± 0.1</b>   | <b>2.2 ± 0.0</b>   |
| L. 6-C-hexoside-8-C-pentoside 2       | 15.6 ± 0.2 b <sup>i</sup>   | 32.5 ± 0.8 a        | 14.2 ± 0.3 b       | /                  | /                  | /                  |
| L. 6-C-pentoside-8-C-hexoside 2       | 8.2 ± 0.1                   | 14.4 ± 0.4          | 10.7 ± 0.1         | /                  | /                  | /                  |
| L.-6-C-hexoside                       | 23.4 ± 0.4                  | 37.4 ± 0.6          | 30.8 ± 0.4         | 164.2 ± 3.9        | 110.6 ± 2.0        | 138.2 ± 1.7        |
| L.-8-C-hexoside                       | 42.5 ± 1.0                  | 64.2 ± 1.1          | 59. ± 1.0          | 216.5 ± 4.3 a      | 70.3 ± 0.8 b       | 72.8 ± 1.4 b       |
| L.-7-O-(2-apiosyl-6-acetyl) hexoside  | 17.1 ± 0.1                  | 25.4 ± 0.6          | 18.6 ± 0.3         | 45.6 ± 0.9         | 31.6 ± 0.7         | 28.9 ± 1.4         |
| L.-7-O-(2-apiosyl-6-malonyl) hexoside | 66.4 ± 0.9                  | 77.2 ± 1.4          | 70.4 ± 0.4         | 127. 2± 1.4        | 122.3 ± 2.3        | 163.2 ± 4.1        |
| L. 6,8-di-C-hexoside                  | 84.6 ± 0.2                  | 98.5 ± 0.3          | 92.2 ± 0.6         | 571.5 ± 5.1        | 718.1 ± 10.8       | 739.5 ± 12.4       |
| C. 7-O-(2-apiosyl-6-acetyl) glucoside | 86.2 ± 1.3 b                | 177.2 ± 3.6 a       | 108.3 ± 2.0 b      | 68.3 ± 1.1         | 50.5 ± 1.4         | 43.5 ± 1.3         |
| A. 6-C-hexoside-8-C-pentoside 1       | 42.6 ± 0.1 b                | 58.3 ± 0.8 a        | 45.5 ± 0.5 b       | 182.8 ± 3.2        | 121.4 ± 1.5        | 131.2 ± 1.9        |
| A. 6-C-hexoside-8-C-pentoside 2       | 11.2 ± 0.4                  | 21.4 ± 0.2          | 22.6 ± 0.3         | 52.1 ± 1.0         | 53.2 ± 1.1         | 41.4 ± 0.7         |
| A. 6-C-pentoside-8-C-hexoside         | 22.5 ± 0.3                  | 45.4 ± 0.8          | 34.8 ± 0.3         | 31.9 ± 0.9         | 30.7 ± 0.3         | 32.1 ± 0.1         |
| A. 6,8 di-C-hexoside                  | 9.1 ± 0.0b                  | 22.5 ± 0.4a         | 14.4 ± 0.2b        | 46.0 ± 1.1         | 41.3 ± 0.7         | 39.8 ± 1.4         |
| <b>Flavone ♦</b>                      | <b>0.3 ± 5.6 b</b>          | <b>0.7 ± 10.6 a</b> | <b>0.5 ± 6.4 b</b> | <b>1.4 ± 0.0 a</b> | <b>1.2 ± 0.0 b</b> | <b>1.1 ± 0.0 b</b> |
| Q.-3-O-rhamnoside-7-O-hexoside        | 22.5 ± 0.3                  | 44.3 ± 1.2          | 39.4 ± 1.0         | 32.5. ± 5.0        | 22.9. ± 6.2        | 272.4 ± 11.4       |
| Q.-3-O-rhamnoside                     | 6.3 ± 0.1                   | 8.3 ± 0.1           | 8.3 ± 0.1          | 13.2 ± 0.7         | 9.5 ± 0.2          | 11.2 ± 0.5         |
| Q.-3-O-glucoside                      | 2.6 ± 0.1                   | 4.2 ± 0.1           | 2.8 ± 0.0          | 6.3 ± 0.1          | 3.1 ± 0.0          | 12.3 ± 0.3         |

|                                 |              |              |               |               |               |               |
|---------------------------------|--------------|--------------|---------------|---------------|---------------|---------------|
| Flavonols                       | 28.3 ± 0.4 b | 69.5 ± 1.7 a | 43.9 ± 1.0 ab | 338.2 ± 5.3 a | 216.4 ± 5.6 b | 173.6 ± 3.6 b |
| Total analyzed per fruit part ♦ | 1.2 ± 0.1 b  | 1.7 ± 0.1 a  | 1.4 ± 0.0 b   | 4.1 ± 0.1 a   | 3.6 ± 0.1 b   | 3.5 ± 0.1 b   |
| Total analyzed whole fruit ♦    | 1.2 ± 0.1 b  | 1.5 ± 0.1 a  | 1.3 ± 0.1 b   |               |               |               |
| TPC ♦                           | 11.2 ± 0.9 b | 13.1 ± 0.7 a | 11.5 ± 0.6 b  | 12.7 ± 0.6 a  | 11.7 ± 0.6 b  | 10.1 ± 0.7 b  |

<sup>i</sup>a,b different letters denote statistical significant differences ( $\alpha \leq 0.05$ ) among treatments in the same cultivar and fruit part

♦ Symbol indicates data in g kg<sup>-1</sup>

/ Symbol indicates that the substance could not be determined

| B                                      | Non-pungent ‘Lombardo tago’ after storage |                     |                      |                    |                    |                    |
|----------------------------------------|-------------------------------------------|---------------------|----------------------|--------------------|--------------------|--------------------|
|                                        | Pericarp                                  |                     |                      | Placenta           |                    |                    |
|                                        | Control                                   | <i>H. halys</i>     | Control 2            | Control            | <i>H. halys</i>    | Control 2          |
| 5-Caffeoxlquinic a. ♦                  | 0.8 ± 0.0                                 | 0.8 ± 0.0           | 0.8 ± 0.0            | 1.6 ± 0.0          | 1.9 ± 0.0          | 1.8 ± 0.0          |
| <b>Hydroxycinnamic a. ♦</b>            | <b>0.8 ± 0.0</b>                          | <b>0.8 ± 0.0</b>    | <b>0.8 ± 0.0</b>     | <b>1.6 ± 0.0</b>   | <b>1.9 ± 0.0</b>   | <b>1.8 ± 0.0</b>   |
| L. 6-C-hexoside-8-C-pentoside 2        | 19.2 ± 0.3                                | 20.2 ± 1.0          | 21.9 ± 0.5           | /                  | /                  | /                  |
| L. 6-C-pentoside-8-C-hexoside 2        | 7.5 ± 0.1                                 | 9.5 ± 0.1           | 11.2 ± 0.1           | /                  | /                  | /                  |
| L.-6-C-hexoside                        | 10.4 ± 0.1 b <sup>i</sup>                 | 23.4 ± 0.1 a        | 12.5 ± 0.2 b         | 44.8 ± 0.4         | 30.8 ± 0.5         | 39.5 ± 0.4         |
| L.-8-C-hexoside                        | 25.8 ± 0.3 b                              | 58.2 ± 0.7 a        | 52.2 ± 0.6 a         | 74.5 ± 2.2         | 102.4 ± 1.3        | 101.2 ± 2.2        |
| L.-7-O-(2-apiosyl-6-acetyl) hexoside   | 15.2 ± 0.1                                | 22.0 ± 0.6          | 13.3 ± 0.3           | 19.2 ± 0.2 b       | 37.6 ± 0.3 a       | 28.7 ± 0.6 ab      |
| L.-7-O-(2-apiosyl-6-malonyl) hexoside  | 83.5 ± 0.9 a                              | 62.5 ± 0.4 b        | 47.7 ± 0.5 b         | 136.4 ± 1.8        | 169.2 ± 1.0        | 152.8 ± 1.4        |
| L. 6,8-di-C-hexoside                   | 60.9 ± 0.2 b                              | 78.3 ± 0.4 a        | 67.2 ± 0.2 b         | 193.7 ± 3.0        | 176.5 ± 1.5        | 185.9 ± 2.0        |
| C. 7-O-(2-apiosyl-6-acetyl) glucoside  | 84.7 ± 2.5                                | 1084.5 ± 2.0        | 96.0 ± 0.5           | 32.3 ± 0.8         | 23.8 ± 0.9         | 25.2 ± 0.7         |
| A. 6-C-hexoside-8-C-pentoside 1        | 22.5 ± 0.2 b                              | 51.5 ± 0.2 a        | 42.0 ± 0.3 a         | 73.2 ± 1.2         | 101.5 ± 1.4        | 120.4 ± 0.8        |
| A. 6-C-hexoside-8-C-pentoside 2        | 13.2 ± 0.2 b                              | 22.3 ± 0.2 a        | 18.8 ± 0.1 b         | 30.7 ± 0.6         | 38.2 ± 0.5         | 40.2 ± 0.8         |
| A. 6-C-pentoside-8-C-hexoside          | 21.6 ± 0.3 b                              | 38.8 ± 0.5 a        | 29.4 ± 0.3 b         | 18.1 ± 0.3 b       | 31.8 ± 0.4 a       | 38.6 ± 0.4 a       |
| A. 6,8 di-C-hexoside                   | 6.5 ± 0.0                                 | 14.3 ± 0.1          | 11.6 ± 0.1           | 16.5 ± 0.2         | 26.4 ± 0.6         | 21.3 ± 0.3         |
| <b>Flavone ♦</b>                       | <b>0.3 ± 4.3 b</b>                        | <b>0.5 ± 4.6 a</b>  | <b>0.3 ± 3.8 b</b>   | <b>6.3 ± 8.4</b>   | <b>7.4 ± 7.0</b>   | <b>7.7 ± 3.2</b>   |
| Q.-3-O-rhamnoside-7-O-hexoside         | 15.6 ± 0.2 b                              | 31.6 ± 0.2 a        | 33.1 ± 0.5 a         | 108.5 ± 6.4        | 188.0 ± 3.9        | 170.4 ± 4.0        |
| Q.-3-O-rhamnoside                      | 4.3 ± 0.1                                 | 31.4 ± 0.2          | 9.6 ± 0.1            | 10.6 ± 0.2         | 19.4 ± 0.3         | 9.3 ± 0.4          |
| Q.-3-O-glucoside                       | 1.5 ± 0.0                                 | 1.2 ± 0.0           | 1.3 ± 0.0            | 7.4 ± 0.1          | 9.3 ± 0.3          | 4.4 ± 0.1          |
| <b>Flavonols</b>                       | <b>19.2 ± 0.1 b</b>                       | <b>40.3 ± 0.5 a</b> | <b>36.8 ± 0.4 ab</b> | <b>110.7 ± 6.3</b> | <b>216.5 ± 4.5</b> | <b>208.2 ± 4.0</b> |
| <b>Total analyzed per fruit part ♦</b> | <b>1.1 ± 0.0 b</b>                        | <b>1.3 ± 0.0 a</b>  | <b>1.2 ± 0.1 b</b>   | <b>2.4 ± 0.3</b>   | <b>2.9 ± 0.2</b>   | <b>2.9 ± 0.1</b>   |
| <b>Total analyzed whole fruit ♦</b>    | <b>1.0 ± 0.0 b</b>                        | <b>1.2 ± 0.0 a</b>  | <b>1.0 ± 0.0 b</b>   |                    |                    |                    |
| <b>TPC ♦</b>                           | <b>8.6 ± 0.9 b</b>                        | <b>11.0 ± 0.5 a</b> | <b>11.2 ± 0.6 a</b>  | <b>7.4 ± 0.6</b>   | <b>8.7 ± 0.8</b>   | <b>7.4 ± 0.9</b>   |

<sup>i</sup>a,b different letters denote statistical significant differences ( $\alpha \leq 0.05$ ) among treatments in the same cultivar and fruit part

◆ Symbol indicates data in g kg<sup>-1</sup>

/ Symbol indicates that the substance could not be determined



Table S3: Individual and total capsaicinoid contents before and after storage of pungent ‘Eris F1’ (**A**) and non-pungent ‘Lombardo tago’ (**B**) (mg kg<sup>-1</sup>; mean ± SE; n = 15) infested with *H. halys*.

| <b>A</b>             |                              | Before storage              |                     |                     | After storage      |                    |                    |
|----------------------|------------------------------|-----------------------------|---------------------|---------------------|--------------------|--------------------|--------------------|
|                      |                              | Control                     | <i>H. halys</i>     | Control 2           | Control            | <i>H. halys</i>    | Control 2          |
| Pungent<br>‘Eris F1’ | Pericarp                     |                             |                     |                     |                    |                    |                    |
|                      | Capsaicin                    | 494.3 ± 11.0 c <sup>i</sup> | 694.7 ± 35.4 a      | 208.1 ± 7.8 b       | 131.3 ± 2.3 c      | 465.5 ± 5.8 a      | 190.6 ± 9.1 b      |
|                      | Dihydrocapsaicin             | 99.2 ± 1.3 c                | 170.7 ± 10.4 a      | 64.8 ± 5.9 b        | 42.4 ± 1.2 c       | 101.9 ± 1.0 a      | 44.4 ± 1.2 b       |
|                      | Nordihydrocapsaicin          | 12.6 ± 0.1 c                | 39.1 ± 2.2 a        | 14.4 ± 5.7 b        | 7.5 ± 0.2 b        | 13.3 ± 2.4 a       | 10.3 ± 2.9 ab      |
|                      | Homocapsaicin                | 9.3 ± 0.1 c                 | 24.3 ± 1.7 a        | 6.1 ± 2.0 b         | 8.3 ± 0.1 b        | 8.6 ± 1.8 a        | 5.7 ± 1.2 ab       |
|                      | Homodihydrocapsaicin         | 10.9 ± 0.1 c                | 32.6 ± 2.1 a        | 10.7 ± 4.2 b        | 5.4 ± 0.3 b        | 12.9 ± 3.3 a       | 8.1 ± 2.7 ab       |
|                      | <b>Total capsaicinoids ♦</b> | <b>0.6 ± 1.1 c</b>          | <b>9.6 ± 2.6 a</b>  | <b>3.0 ± 1.5 b</b>  | <b>0.2 ± 0.0 c</b> | <b>6.0 ± 0.1 a</b> | <b>2.6 ± 0.2 b</b> |
|                      | Placenta                     |                             |                     |                     |                    |                    |                    |
|                      | Capsaicin ♦                  | 16.1 ± 0.3 ab               | 26.0 ± 0.4 a        | 8.3 ± 0.3 b         | 2.7 ± 0.1 ab       | 1.4 ± 0.1 b        | 3.0 ± 0.0 a        |
|                      | Dihydrocapsaicin ♦           | 4.5 ± 0.0 ab                | 6.9 ± 0.0 a         | 2.3 ± 0.0 b         | 0.7 ± 0.0          | 0.3 ± 0.0          | 0.8 ± 0.0          |
|                      | Nordihydrocapsaicin ♦        | 0.9 ± 0.0 ab                | 1.5 ± 0.0 a         | 0.5 ± 0.0 b         | 0.1 ± 0.0          | 0.0 ± 0.0          | 0.1 ± 0.0          |
|                      | Homocapsaicin ♦              | 0.6 ± 0.0 ab                | 1.2 ± 0.0 a         | 0.2 ± 0.0 b         | 0.1 ± 0.0          | 0.1 ± 0.0          | 0.2 ± 0.0          |
|                      | Homodihydrocapsaicin ♦       | 0.9 ± 0.0 b                 | 1.7 ± 0.0 a         | 0.4 ± 0.0 b         | 0.3 ± 0.0          | 0.1 ± 0.0          | 0.4 ± 0.0          |
|                      | <b>Total capsaicinoids ♦</b> | <b>23.2 ± 0.3 b</b>         | <b>37.2 ± 0.5 a</b> | <b>11.9 ± 0.1 c</b> | <b>4.1 ± 0.2 a</b> | <b>2.0 ± 0.0 b</b> | <b>4.7 ± 0.1 a</b> |

<sup>i</sup>a, b, c different letters denote statistical significant differences ( $\alpha \leq 0.05$ ) among treatments in the same cultivar and fruit part

♦ Symbol indicates data in g kg<sup>-1</sup>

/ Symbol indicates that the substance could not be determined

| <b>B</b>                       |                              | Before storage             |                    |                    | After storage      |                    |                    |
|--------------------------------|------------------------------|----------------------------|--------------------|--------------------|--------------------|--------------------|--------------------|
|                                |                              | Control                    | <i>H. halys</i>    | Control 2          | Control            | <i>H. halys</i>    | Control 2          |
| Non-pungent<br>'Lombardo tago' | Capsaicin                    | 129.6 ± 7.1 b <sup>i</sup> | 604.4 ± 3.2 ab     | 828. ± 1.7 a       | 8.7 ± 0.3 a        | 3.2 ± 0.1 b        | 3.1 ± 0.0 b        |
|                                | Dihydrocapsaicin             | 23.2 ± 1.1 b               | 1028.3 ± 6.6 a     | 131.4 ± 9.1 a      | 1.1 ± 0.0          | 1.2 ± 0.0          | 1.1 ± 0.0          |
|                                | Nordihydrocapsaicin          | 4.7 ± 0.0 b                | 13.6 ± 0.6 a       | 10.3 ± 0.4 ab      | < 0.0              | < 0.0              | < 0.0              |
|                                | Homocapsaicin                | 3.3 ± 0.1 b                | 45.4 ± 0.9 a       | 7.7 ± 0.3 b        | < 0.0              | < 0.0              | < 0.0              |
|                                | Homodihydrocapsaicin         | 2.3 ± 0.1 b                | 17.8 ± 1.1 a       | 9.3 ± 0.4 a        | < 0.0              | < 0.0              | < 0.0              |
|                                | <b>Total capsaicinoids ♦</b> | <b>1.8 ± 1.7 b</b>         | <b>7.7 ± 5.5 a</b> | <b>9.9 ± 2.1 a</b> | <b>0.1 ± 0.4 a</b> | <b>0.0 ± 0.0 b</b> | <b>0.0 ± 0.0 b</b> |
|                                | Capsaicin                    | 1109. ± 6.3 b              | 331.4. ± 1.9 a     | 805.5 ± 2.8 b      | 15.2 ± 0.4         | 10.6 ± 0.1         | 16.3 ± 0.5         |
|                                | Dihydrocapsaicin             | 191.3 ± 0.4 b              | 525.4 ± 4.0 a      | 157.2 ± 8.6 b      | 2.6 ± 0.0          | 2.2 ± 0.0          | 2.2 ± 0.0          |
|                                | Nordihydrocapsaicin          | 23.7 ± 0.4 ab              | 34.3 ± 0.5 a       | 13.4 ± 0.1 b       | < 0.0              | < 0.0              | < 0.0              |
|                                | Homocapsaicin                | 41.2 ± 1.5 b               | 91.4 ± 3.3 a       | 27.6 ± 0.5 b       | < 0.0              | < 0.0              | < 0.0              |
|                                | Homodihydrocapsaicin         | 26.7 ± 0.6 b               | 46.3 ± 1.0 a       | 12.4 ± 0.2 b       | < 0.0              | < 0.0              | < 0.0              |
|                                | <b>Total capsaicinoids ♦</b> | <b>1.4 ± 0.1 b</b>         | <b>4.0 ± 0.2 a</b> | <b>1.0 ± 0.0 b</b> | <b>0.2 ± 0.0</b>   | <b>0.1 ± 0.0</b>   | <b>0.2 ± 0.0</b>   |

<sup>i</sup>a, b, c different letters denote statistical significant differences ( $\alpha \leq 0.05$ ) among treatments in the same cultivar and fruit part

♦ Symbol indicates data in g kg<sup>-1</sup>

/ Symbol indicates that the substance could not be determined
